# Supplementary material for: A genetic toolkit for studying transposon control in the Drosophila melanogaster ovary
Source: Genetics. 2021 Oct 30;220(1):iyab179. doi: 10.1093/genetics/iyab179 (PMC8733420; doi:10.1093/genetics/iyab179)
Supplement: iyab179_Supplementary_Table_1 [file iyab179_supplementary_table_1.xlsx]

## Sheet: Table Fly strains
Supplementary Table 1 Fly Strains
Stock ID	Category	Genotype	Gene name	Synonyms	CG_Number	Source	Notes
BDSC_31777	GAL4 driver	Cog-GAL4; NGT-GAL4; nos-GAL4;		Referred to as 'maternal triple driver' (MTD)		Bloomington stock 31777	pan oogenesis GAL4 driver; Cog-GAL4; internalGT-GAL4; nos-GAL4;
BDSC_32956	RNAi line	w; ; pW>su(var)2-10_sh[attP2]/TM3, Sb;	Su(var)2-10	Suppressor of variegation 2-10	CG8068	Bloomington stock 32956
BDSC_33666	RNAi line	w; ; pW20>Hel25E_sh[attP2]/TM3, Sb;	Hel25E	UAP56	CG7269	Bloomington stock 33666	ctagcagtTTCAGACAATGTGTTGACAAAtagttatattcaagcataTTTGTCAACACATTGTCTGAAgcg
BDSC_34021	RNAi line	w; ; pW22>CRM1_sh[attP2]/TM3, Sb;	embargoed	emb, xpo1	CG13387	Bloomington stock 34021	Expresses dsRNA for RNAi of emb (FBgn0020497) under UAS control in the VALIUM20 vector.
BDSC_35806	RNAi line	w; ; pW22>uba2_sh[attP2]/TM3, Sb;	Uba2	Ubiquitin-like activating enzyme 2	CG7528	Bloomington stock 35806	Expresses dsRNA for RNAi of Uba2 (FBgn0029113) under UAS control in the VALIUM22 vector.
BDSC_36074	RNAi line	w; ; pW22>aos1_sh[attP2]/TM3, Sb;	aos1	Activator of SUMO 1	CG12276	Bloomington stock 36074	Expresses dsRNA for RNAi of Aos1 (FBgn0029512) under UAS control in the VALIUM22 vector.
BDSC_41556	RNAi line	w; ; pW20>eGFP_sh[attP2]/TM3, Sb;	Green Fluorescent Protein	GFP		Neumüller et al., 2012	GFPshRNA line
BDSC_44241	GAL4 driver	w[1118]; P{w[+mC]=osk-GAL4::VP16}A11/CyO	osk	Oskar-GAL4	CG10901	Imre Gaspar	Expresses GAL4 fused to the VP16 activator domain in the germ line under control of osk regulatory sequences. Chr. 2
BDSC_4937	Gal4 driver	;; P{GAL4: :VP16-nos.UTR}CG6325[MVD1]	nos	nos-GAL4	CG5637	Bloomington stock 4937	entry strain
BDSC_7062	GAL4 driver	w[*]; P{w[+mC]=matalpha-GAL4-VP16}V2H/CyO	alphaTub67C, GAL4::VP16	Mat-tub-GAL4		Daniel St Johnston	GAL4-VP16 fusion protein expressed under the control of the alphaTub67C promoter. Chr. 2
VDRC_105980	RNAi line	w; P{KK101786}VIE-260B;	smt3	SUMO	CC4494	VDRC stock 105980
VDRC_313156	RNAi line	w; ; pW20>rhi_sh[attP2]/TM3, Sb;	rhi	Rhino	CG10683	Mohn et al., 2014
VDRC_313411	MTD;GFP reporter	Cog-Gal4; NGT-Gal4/CyO; nosGal4, 3xFLAG_V5_Precission_GFP-Gtsf1/TM3,Ser;	arx	asterix/Gtsf1	CG3893	This paper
VDRC_313413	RNAi line	; ; pGLKD>aub_sh1[attP2]/TM3;	aub	aubergine	CG6137	Ni et al., 2011
VDRC_313620	MTD;GFP reporter	Cog-Gal4; NGT-Gal4/CyO; nosGal4, 3xFLAG_V5_Precission_GFP-Gasz/TM3,Ser;	Gasz		CG2183	This paper
VDRC_313662	MTD;GFP reporter	Cog-GAL4; NGT-GAL4/CyO; nos-GAL4, Boot-GFP_Precission_V5_3xFLAG/TM3,Ser;	Boot	Bootlegger	CG13741	ElMaghraby et al., 2019
VDRC_313667	MTD;GFP reporter	Cog-GAL4; NGT-GAL4/CyO; nos-GAL4, 3xFLAG_V5_Precission_GFP-rhi/TM3,Ser;	rhi	rhino	CG10683	Mohn et al., 2014
VDRC_313668	MTD;GFP reporter	Cog-GAL4; NGT-GAL4/CyO; nos-GAL4, GFP-piwi/TM3,Ser;	piwi		CG6122	Senti et al. 2015
VDRC_313669	MTD;GFP reporter	Cog-GAL4; NGT-GAL4/CyO; nos-GAL4, GFP-aub/TM3,Ser;	aub	aubergine	CG6137	This paper
VDRC_313670	MTD;GFP reporter	Cog-GAL4; NGT-GAL4/CyO; nos-GAL4, spnE-GFP/TM3,Ser;	spn-E	spindle-E	CG3158	This paper
VDRC_313671	MTD;GFP reporter	Cog-GAL4; NGT-GAL4/CyO; nos-GAL4, GFP-vas/TM3,Ser;	vas	vasa	CG46283	This paper
VDRC_313672	MTD;GFP reporter	Cog-GAL4; NGT-GAL4/CyO; nos-GAL4, 3xFLAG_V5_Precission_GFP-del/TM3,Ser;	del	deadlock	CG9252	Mohn et al., 2014
VDRC_313673	MTD;GFP reporter	Cog-GAL4; NGT-GAL4; nos-GAL4, nos-GAL4, 3xFLAG_V5_Precission_GFP-Nxf2/TM3, Ser;	nxf2	Nuclear export factor 2	CG4118	This paper
VDRC_313674	MTD;GFP reporter	Cog-GAL4; NGT-GAL4/CyO; nos-GAL4, CG14438-GFP/TM3,Ser;	sov	small ovary	CG14438	This paper
VDRC_313677	MTD;GFP reporter	Cog-GAL4; NGT-GAL4/CyO; nos-GAL4, 3xFLAG_V5_Precission_GFP-cuff/TM3,Ser;	cuff	cutoff	CG13190	Mohn et al., 2014
VDRC_313714	MTD;GFP reporter	Cog-GAL4; NGT-GAL4; nos-GAL4, Zuc_GFP_Precission_V5_3xFLAG/TM3, Ser;	zuc	zucchini	CG12314	Hayashi & Schnabl et al., 2016
VDRC_313772	RNAi line	w; ; pW20>w_sh[attP2]/TM3, Sb;	w	white	CG2759	Mohn et al., 2014
VDRC_313780	MTD;GFP reporter	Cog-GAL4; NGT-GAL4/CyO; nos-GAL4, 3xFLAG_V5_Precission_GFP-moon/TM3,Ser;	moon	moonshiner	CG12721	ElMaghraby et al., 2019
VDRC_313873	MTD;GFP reporter	Cog-Gal4; NGT-Gal4/CyO; nosGal4, 3xFLAG_V5_Precission_GFP-Nbr/TM3,Ser;	Nbr	Nibbler	CG9247	This paper
VDRC_313897	MTD;GFP reporter	Cog-Gal4; NGT-Gal4/CyO; nos-Gal4, BoxB_GFP_sensor/TM3,Ser;				Sienski et al., 2015	MTD boxB sensor stock
VDRC_313902	MTD;GFP reporter	Cog-GAL4; NGT-GAL4/CyO; nos-GAL4, 3xFLAG_V5_Precission_GFP_Egg/TM3, Ser;	egg	eggless	CG12196	This paper
VDRC_313903	MTD;GFP reporter	Cog-GAL4; NGT-GAL4/CyO; nos-GAL4, Su(var)3-9-GFP_Precission_V5_3xFLAG/TM3, Ser;	Su(var)3-9	Suppressor of variegation 3-9	CG43664	This paper
VDRC_313904	MTD;GFP reporter	Cog-GAL4; NGT-GAL4/CyO; nos-GAL4, 3xFLAG_V5_Precission_GFP_Panx/TM3, Ser;	Panx	Panoramix	CG9754	This paper
VDRC_313998	tagged endogenous genes	w; Boot_GFP_Precission_V5_3xFLAG;	Boot	Bootlegger	CG13741	ElMaghraby et al., 2019
VDRC_314033	GAL4 driver	w; matalpha-GAL4-VP16, osk-GAL4-VP16/CyO;		Tosk-Gal4		This paper	Based on BDSC stocks 7062 and 44241
VDRC_314034	GAL4 driver	w; matalpha-GAL4-VP16,osk-GAL4-VP16/CyO; bam-GAL4/TM3, Ser		Bam-TOsk-Gal4		This paper
VDRC_314035	RNAi line	w; ; pW20>thoc5_sh[attP2]/TM3, Sb;	thoc5		CG2980	This paper	ctagcagtCAAGCTCACTGCGTTAAAGAAtagttatattcaagcataTTCTTTAACGCAGTGAGCTTGgcg
VDRC_314036	RNAi line	w; ; pW20>thoc7_sh[attP2]/TM3, Sb;	thoc7		CG17143	This paper	ctagcagtCAACAGTTCGATGCTGTACAAtagttatattcaagcataTTGTACAGCATCGAACTGTTGgcg
VDRC_314037	tagged endogenous genes	w; AID-FLAG-V5-Precission-GFP-Piwi/CyO;	Piwi		CG6122	This paper
VDRC_314038	GAL4 driver	; tj-GAL4;	tj	traffic jam	CG10034	from Kyoto collection	somatic follicle cell driver
VDRC_314039	reporter line	w; pUASP-H2A-EGFP-BLRP/CyO;	His 2A	Histone 2A		This paper	by KS Senti, in attP33
VDRC_314040	reporter line	w; AID-FLAG-V5-Precission-GFP-Piwi; pW20>eGFP_shRNA	piwi		CG6122	This paper	based on AID-GFP-Piwi knockin and Bloomington stock 41556
VDRC_314041	MTD;GFP reporter	Cog-GAL4; NGT-GAL4/If; nos-GAL4, Thoc5-GFP_Precission_V5_3xFLAG/TM3,Ser;	thoc5		CG2980	This paper
VDRC_314042	MTD;GFP reporter	Cog-GAL4; NGT-GAL4/If; nos-GAL4,/3xFLAG_V5_Precission_GFP-Thoc7/TM3,Ser;	thoc7		CG17143	This paper
VDRC_314043	MTD;GFP reporter	Cog-GAL4; NGT-GAL4/If; nos-GAL4,/3xFLAG_V5_Precission_GFP-THO2/TM3,Ser;	Tho2		CG31671	This paper
VDRC_314044	MTD;GFP reporter	Cog-GAL4; NGT-GAL4; nos-GAL4, Nxf3_GFP_Precission_V5_3xFLAG[attP2]/TM3, Ser;	nxf3	Nuclear export factor 3	CG32135	ElMaghraby et al., 2019
VDRC_314045	MTD;GFP reporter	Cog-GAL4; NGT-GAL4/CyO; nos-GAL4, 3xFLAG_V5_Precission_GFP-Hel25E/TM3,Ser;	Hel25E	UAP56	CG7269	ElMaghraby et al., 2019
VDRC_314046	Gal4 driver	Cog-GAL4; NGT-GAL4; Sb/TM3,Ser;				This paper	entry strain
VDRC_314047	BoxB silencing reporter	; pUASp>lambdaN-HA-Panx [attP40] tub>EGFP_5xBoxB_SV40 [attP33]/CyO;	Panx	Panoramix	CG9754	This paper
VDRC_33685	RNAi line	w; P{GD10017}v33685;	ubc9	lwr	CG3018	VDRC stock 33685
VDRC_60010	UAS-Dcr-2	w[1118], P{UAS-dicer2, w[+]}; Pin / Cyo	Dcr-2	Dcr-2		VDRC_60010	required for efficient RNAi using the VDRC long hairpin collection
