# Supplementary material for: A genetic toolkit for studying transposon control in the Drosophila melanogaster ovary
Source: Genetics. 2021 Oct 30;220(1):iyab179. doi: 10.1093/genetics/iyab179 (PMC8733420; doi:10.1093/genetics/iyab179)
Supplement: iyab179_Supplementary_Table_4 [file iyab179_supplementary_table_4.xlsx]

## Sheet: Oligo sequences
Supplementary Table 4 Oligo Sequences
Oligo#	Name	Sequence	Source	Purpose
1	HeTa_mRNA_FW	CGCGCGGAACCCATCTTCAGA	Sigma-Aldrich	Oligos used for RTqPCR of transposon mRNAs
2	HeTa_mRNA_RE	CGCCGCAGTCGTTTGGTGAGT	Sigma-Aldrich
3	blood_mRNA_FW	AACAATAGAAAGAAGCCACCGAAC	Sigma-Aldrich
4	blood_mRNA_RE	AGTCATGGACTATTGAGGGTGTTG	Sigma-Aldrich
5	burdock_mRNA_FW	CGGTAAAATCGCTTCATGGT	Sigma-Aldrich
6	burdock_mRNA_RE	ACGTTGCATTTCCCTGTTTC	Sigma-Aldrich
7	Rrp49_mRNA_FW	CCGCTTCAAGGGACAGTATCTG	Sigma-Aldrich
8	Rrp49_mRNA_RE	ATCTCGCCGCAGTAAACGC	Sigma-Aldrich
