# Supplementary material for: A genetic toolkit for studying transposon control in the Drosophila melanogaster ovary
Source: Genetics. 2021 Oct 30;220(1):iyab179. doi: 10.1093/genetics/iyab179 (PMC8733420; doi:10.1093/genetics/iyab179)
Supplement: iyab179_Supplementary_Table_5 [file iyab179_supplementary_table_5.xlsx]

## Sheet: NGS data
Supplementary Table 5 NGS Data
Library Name	SRA number	# total reads	% of good reads	% of mapped reads	% of rRNA reads
MTD_sh[w]-rep1	SRX10918646	11890598	99.8083	84.6462	0.104891
MTD_sh[w]-rep2	SRX10918647	13831309	99.8424	86.4275	0.104003
MTD_sh[piwi]-rep1	SRX10918648	14644486	98.9764	81.9111	0.100971
MTD_sh[piwi]-rep2	SRX10918649	11856805	99.8294	87.0019	0.0474362
TOskII_sh[w]-rep1	SRX10918650	12566988	99.8836	90.019	0.0626576
TOskII_sh[w]-rep2	SRX10918651	12821338	99.8453	89.1917	0.06411
TOskII_sh[piwi]-rep1	SRX10918652	12468857	99.7448	89.3339	0.0374691
TOskII_sh[piwi]-rep2	SRX10918653	10997340	99.7461	88.3547	0.0686959
TOskII_sh[Hel25E]-rep1	SRX10918654	12171012	99.6735	83.73	2.54746
TOskII_sh[Hel25E]-rep2	SRX10918655	11689759	98.9603	85.0028	0.120824
TOskII_sh[Su(var)2-10]-rep1	SRX10918656	14834575	99.7733	89.418	0.0221916
TOskII_sh[Su(var)2-10]-rep2	SRX10918657	9787486	99.5585	88.6972	0.0569832
TOskII_sh[Uba2]-rep1	SRX10918658	13378220	99.7193	91.2414	0.0488408
TOskII_sh[Uba2]-rep2	SRX10918659	14054217	99.8477	91.8651	0.0466906
TOskII_sh[Aos1]-rep1	SRX10918660	12323070	99.7328	91.4796	0.173023
TOskII_sh[Aos1]-rep2	SRX10918661	11866086	99.8811	92.4855	0.138486
